# Supplementary material
Source: ML conference proceedings conference paper supplement (https://proceedings.neurips.cc/paper_files/paper/2020/hash/d785bf9067f8af9e078b93cf26de2b54-Abstract.html)
Supplement: Supplementary file [file d785bf9067f8af9e078b93cf26de2b54-Supplemental.pdf]

364 **Supplementary Material**

365 **A Omitted Proofs from Section 3**

366 **A.1 Proof of Lemma 3.2**

367 *Proof of Lemma 3.2.* To simplify notation, we will write  $h(\mathbf{w}, \mathbf{x}) = \frac{\langle \mathbf{w}, \mathbf{x} \rangle}{\|\mathbf{w}\|_2}$ . Note that  $\nabla_{\mathbf{w}} h(\mathbf{w}, \mathbf{x}) =$   
 368  $\frac{\mathbf{x}}{\|\mathbf{w}\|_2} - \langle \mathbf{w}, \mathbf{x} \rangle \frac{\mathbf{w}}{\|\mathbf{w}\|_2^3}$ . We define the “noisy” region  $S$ , as follows  $S = \{\mathbf{x} \in \mathbb{R}^d : y \neq \text{sign}(\langle \mathbf{w}^*, \mathbf{x} \rangle)\}$ .  
 369 The gradient of the objective  $\mathcal{L}_\sigma(\mathbf{w})$  is then

$$\begin{aligned} \nabla_{\mathbf{w}} \mathcal{L}_\sigma(\mathbf{w}) &= \mathbf{E}_{(\mathbf{x}, y) \sim \mathcal{D}} [-S'_\sigma(-y h(\mathbf{w}, \mathbf{x})) \nabla_{\mathbf{w}} h(\mathbf{w}, \mathbf{x}) y] \\ &= \mathbf{E}_{(\mathbf{x}, y) \sim \mathcal{D}} [-S'_\sigma(|h(\mathbf{w}, \mathbf{x})|) \nabla_{\mathbf{w}} h(\mathbf{w}, \mathbf{x}) y] \\ &= \mathbf{E}_{\mathbf{x} \sim \mathcal{D}_{\mathbf{x}}} [-S'_\sigma(|h(\mathbf{w}, \mathbf{x})|) \nabla_{\mathbf{w}} h(\mathbf{w}, \mathbf{x}) (\mathbb{1}_{S^c}(\mathbf{x}) - \mathbb{1}_S(\mathbf{x})) \text{sign}(\langle \mathbf{w}^*, \mathbf{x} \rangle)] \\ &= \mathbf{E}_{\mathbf{x} \sim \mathcal{D}_{\mathbf{x}}} [-S'_\sigma(|h(\mathbf{w}, \mathbf{x})|) \nabla_{\mathbf{w}} h(\mathbf{w}, \mathbf{x}) (1 - 2 \cdot \mathbb{1}_S(\mathbf{x})) \text{sign}(\langle \mathbf{w}^*, \mathbf{x} \rangle)] . \end{aligned}$$

370 Let  $V = \text{span}(\mathbf{w}^*, \mathbf{w})$ . Since projections can only decrease the norm of a vector, we have  
 371  $\|\nabla_{\mathbf{w}} \mathcal{L}_\sigma(\mathbf{w})\|_2 \geq \|\text{proj}_V \nabla_{\mathbf{w}} \mathcal{L}_\sigma(\mathbf{w})\|_2$ . Without loss of generality, we may assume that  $\widehat{\mathbf{w}} = \mathbf{e}_2$   
 372 and  $\mathbf{w}^* = -\sin \theta \cdot \mathbf{e}_1 + \cos \theta \cdot \mathbf{e}_2$ . Then, we have  $\text{proj}_V(h(\mathbf{w}, \mathbf{x})) = (\mathbf{x}_1, 0)$ . Using the above and  
 373 the triangle inequality, we obtain

$$\begin{aligned} \|\nabla_{\mathbf{w}} \mathcal{L}_\sigma(\mathbf{w})\|_2 &\geq \underbrace{\left\| \mathbf{E}_{\mathbf{x} \sim \mathcal{D}_{\mathbf{x}}} [-S'_\sigma(|h(\mathbf{w}, \mathbf{x})|) (\mathbf{x}_1, 0) \text{sign}(\langle \mathbf{w}^*, \mathbf{x} \rangle)] \right\|_2}_{I_1} \\ &\quad - 2 \underbrace{\left\| \mathbf{E}_{\mathbf{x} \sim \mathcal{D}_{\mathbf{x}}} [-\mathbb{1}_S(\mathbf{x}) S'_\sigma(|h(\mathbf{w}, \mathbf{x})|) (\mathbf{x}_1, 0) \text{sign}(\langle \mathbf{w}^*, \mathbf{x} \rangle)] \right\|_2}_{I_2} . \end{aligned}$$

374 Let  $R, U$  be absolute constants from the Definition 1.2. We will first bound from above the term  $I_2$ ,  
 375 i.e., the contribution of the noisy points to the gradient. Using the fact that  $S'_\sigma(|t|) \leq e^{-|t|/\sigma}/\sigma$  we  
 376 obtain

$$\begin{aligned} I_2 &\leq \mathbf{E}_{\mathbf{x} \sim \mathcal{D}_{\mathbf{x}}} \left[ \frac{e^{-|\mathbf{x}_2|/\sigma}}{\sigma} |\mathbf{x}_1| \mathbb{1}_S(\mathbf{x}) \right] \leq \sqrt{\mathbf{E}_{\mathbf{x} \sim \mathcal{D}_{\mathbf{x}}} [\mathbb{1}_S(\mathbf{x})]} \sqrt{\mathbf{E}_{\mathbf{x} \sim \mathcal{D}_{\mathbf{x}}} \left[ \frac{e^{-2|\mathbf{x}_2|/\sigma}}{\sigma^2} \mathbf{x}_1^2 \right]} \\ &\leq \sqrt{\frac{\text{opt}}{\sigma}} \sqrt{\mathbf{E}_{\mathbf{x} \sim (\mathcal{D}_{\mathbf{x}})_V} \left[ \frac{e^{-2|\mathbf{x}_2|/\sigma}}{\sigma} \mathbf{x}_1^2 \right]} , \end{aligned}$$

377 where the first inequality follows from the Cauchy-Schwarz inequality and for the second we used  
 378 the fact that the set  $S$  has probability at most  $\text{opt}$ . To finish the bound, notice that the remaining  
 379 expectation depends only on  $\mathbf{x}_1, \mathbf{x}_2$  and therefore we can use the upper bound  $t(\cdot)$  on the density  
 380 function. Using polar coordinates we obtain

$$\begin{aligned} \mathbf{E}_{\mathbf{x} \sim (\mathcal{D}_{\mathbf{x}})_V} \left[ \frac{e^{-2|\mathbf{x}_2|/\sigma}}{\sigma} \mathbf{x}_1^2 \right] &\leq 4 \int_0^\infty \int_0^{\pi/2} \frac{r^3}{\sigma} \cos^2(\phi) e^{-2r \sin(\phi)/\sigma} t(r) d\phi dr \\ &\leq 2 \int_0^\infty r^2 t(r) \int_0^{\pi/2} \frac{2r}{\sigma} \cos(\phi) e^{-2r \sin(\phi)/\sigma} d\phi dr \\ &= 2 \int_0^\infty r^2 t(r) (1 - e^{-2r/\sigma}) dr \leq 2 \int_0^\infty r^2 t(r) dr \leq 2U , \end{aligned}$$

381 where for the last inequality we used the fact that  $1 - e^{-2r/\sigma} \leq 1$ . We thus have  $I_2 \leq \sqrt{2U \text{opt}/\sigma}$ .

382 We now bound  $I_1$  from below. Observe that since inner products with  $\mathbf{w}^*$ ,  $\mathbf{w}$  are preserved when  
 383 we project  $\mathbf{x}$  to  $V$ , we have  $I_1 = \left| \mathbf{E}_{\mathbf{x} \sim (\mathcal{D}_{\mathbf{x}})_V} [S'_\sigma(|\mathbf{x}_2|) \mathbf{x}_1 \text{sign}(\langle \mathbf{w}^*, \mathbf{x} \rangle)] \right|$ . Now, if we define  $G =$   
 384  $\{(\mathbf{x}_1, \mathbf{x}_2) \in \mathbb{R}^2 : \mathbf{x}_1 \text{sign}(\langle \mathbf{w}^*, \mathbf{x} \rangle) > 0\}$ , using the triangle inequality we have

$$I_1 \geq \mathbf{E}_{\mathbf{x} \sim (\mathcal{D}_{\mathbf{x}})_V} [S'_\sigma(|\mathbf{x}_2|) |\mathbf{x}_1| \mathbb{1}_G(\mathbf{x})] - \mathbf{E}_{\mathbf{x} \sim (\mathcal{D}_{\mathbf{x}})_V} [S'_\sigma(|\mathbf{x}_2|) |\mathbf{x}_1| \mathbb{1}_{G^c}(\mathbf{x})] .$$

385 Moreover, using the fact that  $e^{-|t|/\sigma}/(4\sigma) \geq S'_\sigma(|t|) \leq e^{-|t|/\sigma}/\sigma$  we get

$$I_1 \geq \frac{1}{4} \mathbf{E}_{\mathbf{x} \sim (\mathcal{D}_x)_V} \left[ |\mathbf{x}_1| \mathbb{1}_G(\mathbf{x}) e^{-|\mathbf{x}_2|/\sigma} \right] - \mathbf{E}_{\mathbf{x} \sim (\mathcal{D}_x)_V} \left[ |\mathbf{x}_1| \mathbb{1}_{G^c}(\mathbf{x}) e^{-|\mathbf{x}_2|/\sigma} \right]. \quad (9)$$

386 We can now bound each term separately using the fact that the distribution  $\mathcal{D}_x$  is well-behaved.  
 387 Assume first that  $\theta(\mathbf{w}^*, \widehat{\mathbf{w}}) = \theta \in (0, \pi/2)$ . Then we can express the region  $G$  in polar coordinates  
 388 as  $G = \{(r, \phi) : \phi \in (0, \theta) \cup (\pi/2, \pi + \theta) \cup (3\pi/2, 2\pi)\}$ .

389 We denote by  $\gamma(x, y)$  the density of the 2-dimensional projection on  $V$  of the marginal distribution  
 390  $\mathcal{D}_x$ . Since the integral is non-negative, we can bound from below the contribution of region  $G$  on the  
 391 gradient by integrating over  $\phi \in (\pi/2, \pi)$ . Specifically, we have:

$$\begin{aligned} \mathbf{E}_{\mathbf{x} \sim (\mathcal{D}_x)_V} \left[ \frac{e^{-|\mathbf{x}_2|/\sigma}}{\sigma} |\mathbf{x}_1| \mathbb{1}_G(\mathbf{x}) \right] &\geq \int_0^\infty \int_{\pi/2}^\pi \gamma(r \cos \phi, r \sin \phi) r^2 |\cos \phi| \frac{e^{-\frac{r \sin \phi}{\sigma}}}{\sigma} d\phi dr \\ &= \int_0^\infty \int_0^{\pi/2} \gamma(r \cos \phi, r \sin \phi) r^2 \cos \phi \frac{e^{-\frac{r \sin \phi}{\sigma}}}{\sigma} d\phi dr \\ &\geq \frac{1}{U} \int_0^R r^2 dr \int_0^{\pi/2} \cos \phi \frac{e^{-\frac{R \sin \phi}{\sigma}}}{\sigma} d\phi \\ &= \frac{1}{3U} R^2 \left( 1 - e^{-\frac{R}{\sigma}} \right) \geq \frac{1}{4U} R^2, \end{aligned} \quad (10)$$

392 where for the second inequality we used the lower bound  $1/U$  on the density function  $\gamma(x, y)$  (see  
 393 Definition 1.2) and for the last inequality we used that  $\sigma \leq \frac{R}{8}$  and that  $1 - e^{-8} \geq 3/4$ .

394 We next bound from above the contribution of the gradient in region  $G^c$ . Note that  $G^c = \{(r, \phi) :$   
 395  $\phi \in B_\theta = (\pi/2 - \theta, \pi/2) \cup (3\pi/2 - \theta, 3\pi/2)\}$ . Hence, we can write:

$$\begin{aligned} \mathbf{E}_{\mathbf{x} \sim (\mathcal{D}_x)_V} \left[ \frac{e^{-|\mathbf{x}_2|/\sigma}}{\sigma} |\mathbf{x}_1| \mathbb{1}_{G^c}(\mathbf{x}) \right] &= \frac{1}{\sigma} \int_0^\infty \int_{\phi \in B_\theta} \gamma(r \cos \phi, r \sin \phi) r^2 \cos \phi e^{-\frac{r \sin \phi}{\sigma}} d\phi dr \\ &\leq \frac{2U}{\sigma} \int_0^\infty \int_\theta^{\pi/2} r^2 \cos \phi e^{-\frac{r \sin \phi}{\sigma}} d\phi dr \\ &= \frac{2U\sigma^2 \cos^2 \theta}{\sin^2 \theta}, \end{aligned} \quad (11)$$

396 where the inequality follows from the upper bound  $U$  on the density  $\gamma(x, y)$  (see Definition 1.2).  
 397 Putting everything in (9), we obtain  $I_1 \geq R^2/(16U) - 2U\sigma^2/\sin^2 \theta$ . Notice now that the case where  
 398  $\theta(\widehat{\mathbf{w}}, \mathbf{w}^*) \in (\pi/2, \pi - \theta)$  follows similarly. Finally, in the case where  $\theta = \pi/2$ , the region  $G^c$  is  
 399 empty, and we again get the same lower bound on the gradient. Let  $A > 0$ , and set  $\theta = A \cdot \sigma < \pi/2$ ,  
 400 and let  $\tau = \text{opt}/\sigma$ . Since  $\sin(t) \geq 2t/\pi$  for every  $t \in [0, \pi/2]$ , we have

$$I_1 - 2I_2 \geq \frac{R^2}{16U} - \frac{\pi^2 U}{2A^2} - 2\sqrt{2U\tau}.$$

401 For  $\tau \leq \frac{R^4}{2^{15}U^3}$  and  $A \geq 4\sqrt{2\pi}U/R$ , it holds  $I_1 - 2I_2 \geq R^2/(32U)$ . □

## 402 A.2 Proof of Claim 3.4

403 *Proof.* Let  $S = \{\mathbf{x} \in \mathbb{R}^d : y \neq f(\mathbf{x})\}$ , then we have

$$\begin{aligned} \text{err}_{0-1}^{\mathcal{D}_x}(h_{\mathbf{u}}, f) &= \int_{S^c} \mathbb{1}\{h_{\mathbf{u}}(\mathbf{x}) \neq y\} \gamma(\mathbf{x}) d\mathbf{x} + \int_S \mathbb{1}\{h_{\mathbf{u}}(\mathbf{x}) = y\} \gamma(\mathbf{x}) d\mathbf{x} \\ &= \int_{\mathbb{R}^d} \mathbb{1}\{h_{\mathbf{u}}(\mathbf{x}) \neq y\} \gamma(\mathbf{x}) d\mathbf{x} + 2 \int_S \mathbb{1}\{h_{\mathbf{u}}(\mathbf{x}) = y\} \gamma(\mathbf{x}) d\mathbf{x} - \int_S \gamma(\mathbf{x}) d\mathbf{x} \\ &= \text{err}_{0-1}^{\mathcal{D}_x}(h_{\mathbf{u}}) + 2 \int_S \mathbb{1}\{h_{\mathbf{u}}(\mathbf{x}) = y\} \gamma(\mathbf{x}) d\mathbf{x} - \text{err}_{0-1}^{\mathcal{D}_x}(f). \end{aligned}$$

404 Using that  $\int_S \mathbb{1}\{h_{\mathbf{u}}(\mathbf{x}) = y\}\gamma(\mathbf{x})d\mathbf{x} \geq 0$ , the result follows. To prove that  $\text{err}_{0-1}^{\mathcal{D}^{\mathbf{x}}}(h_{\mathbf{u}}, f) -$   
 405  $\text{err}_{0-1}^{\mathcal{D}}(f) \leq \text{err}_{0-1}^{\mathcal{D}}(h_{\mathbf{u}})$ , we work as follows

$$\begin{aligned} \text{err}_{0-1}^{\mathcal{D}^{\mathbf{x}}}(h_{\mathbf{u}}, f) &= \int_{S^c} \mathbb{1}\{h_{\mathbf{u}}(\mathbf{x}) \neq y\}\gamma(\mathbf{x})d\mathbf{x} + \int_S \mathbb{1}\{h_{\mathbf{u}}(\mathbf{x}) = y\}\gamma(\mathbf{x})d\mathbf{x} \\ &= \int_{\mathbb{R}^d} \mathbb{1}\{h_{\mathbf{u}}(\mathbf{x}) \neq y\}\gamma(\mathbf{x})d\mathbf{x} + \int_S \gamma(\mathbf{x})d\mathbf{x} - 2 \int_S \mathbb{1}\{h_{\mathbf{u}}(\mathbf{x}) \neq y\}\gamma(\mathbf{x})d\mathbf{x} \\ &= \text{err}_{0-1}^{\mathcal{D}}(h_{\mathbf{u}}) + \text{err}_{0-1}^{\mathcal{D}}(f) - 2 \int_S \mathbb{1}\{h_{\mathbf{u}}(\mathbf{x}) \neq y\}\gamma(\mathbf{x})d\mathbf{x}. \end{aligned}$$

406 To finish the proof, note that  $\int_S \mathbb{1}\{h_{\mathbf{u}}(\mathbf{x}) \neq y\}\gamma(\mathbf{x})d\mathbf{x} \geq 0$ . □

### 407 A.3 Proof of Lemma 3.5

408 *Proof.* Let  $R, U$  be the absolute constants from the Definition 1.2. If we set  $\rho = \frac{R^2}{32U}$ , by Claim 3.4,  
 409 to guarantee  $\text{err}_{0-1}^{\mathcal{D}^{\mathbf{x}}}(h_{\hat{\mathbf{w}}}, f) \leq \sigma$  it suffices to show that the angle  $\theta(\hat{\mathbf{w}}, \mathbf{w}^*) \leq O(\sigma) =: \theta_0$ . Using  
 410 (the contrapositive of) Lemma 3.2, if the norm squared of the gradient of some vector  $\mathbf{w} \in \mathbb{S}^{d-1}$  is  
 411 smaller than  $\rho$ , then  $\mathbf{w}$  is close to either  $\mathbf{w}^*$  or  $-\mathbf{w}^*$  – that is,  $\theta(\mathbf{w}, \mathbf{w}^*) \leq \theta_0$  – or  $\theta(\mathbf{w}, -\mathbf{w}^*) \leq \theta_0$ .  
 412 Therefore, it suffices to find a point  $\mathbf{w}$  with gradient  $\|\nabla_{\mathbf{w}} \mathcal{L}_{\sigma}(\mathbf{w})\|_2 \leq \rho$ . From Lemma 3.3, after  
 413  $T = O(\frac{d}{\sigma^4 \rho^4} \log(1/\delta))$  steps, the norm of the gradient of some vector in the list  $(\mathbf{w}^{(0)}, \dots, \mathbf{w}^{(T)})$   
 414 will be at most  $\rho$  with probability  $1 - \delta$ . Therefore, the required number of iterations is  $T =$   
 415  $\text{poly}(U/R) \cdot d \frac{\log(1/\delta)}{\sigma^4}$ . Note that one of the hypotheses in the list that is returned by Algorithm 1 is  
 416  $\sigma$ -close to the true  $\mathbf{w}^*$ . From Claim 3.4, we have that there exists a  $\hat{\mathbf{w}} \in L$  such that  $\text{err}_{0-1}^{\mathcal{D}}(h_{\hat{\mathbf{w}}}) \leq$   
 417  $\text{opt} + O(\sigma) = \text{opt} + O(\sigma)$ . □

### 418 A.4 Proof of Theorem 1.3

419 *Proof of Theorem 1.3.* Let  $R, U$  be the absolute constants from Definition 1.2. and let  $C =$   
 420  $2^{15}U^3/R^4$ . We will do binary search to find the correct value of  $\sigma$  using a grid of size  $O(1/\epsilon)$ .  
 421 In particular, we consider  $\sigma \in \{C\epsilon, (C+1)\epsilon, \dots, C\}$ . We now analyze our binary search over this  
 422 grid. We have three cases. We first assume that  $\epsilon \leq \text{opt} \leq C$ . Let  $L_k$  be the list of candidates output  
 423 by Algorithm 1 for  $\sigma = k \cdot \epsilon$ . Note that there is a value of  $k$  such that  $\text{opt} < C\sigma$  and  $\text{opt} > C\sigma - \epsilon$ .  
 424 Then we have that there exists  $\hat{\mathbf{w}} \in L_k$  such that  $\text{err}_{0-1}(h_{\hat{\mathbf{w}}}) \leq \text{opt} + O(\sigma) = O(\text{opt}) + \epsilon$ . To find  
 425 the right value of  $k$ , we do binary search in the  $O(1/\epsilon)$ -sized grid of possible values and check each  
 426 time if we obtained a weight vector that decreased the overall error. Thus, we will overall construct  
 427  $\text{poly}(R/U) \cdot \log(1/\epsilon)$  lists. Finally, to evaluate all the vectors from the list, we need a small number  
 428 of samples from the distribution  $\mathcal{D}$  to obtain the best among them, i.e., the one that minimizes the  
 429 zero-one loss. The maximum size of each list of candidates is  $\text{poly}(U/R) \cdot d \frac{\log(1/\delta)}{\epsilon^4}$ . Therefore, from  
 430 Hoeffding's inequality, it follows that  $O(\log(d/(\epsilon\delta))/\epsilon^2)$  samples are sufficient to guarantee that the  
 431 excess error of the chosen hypothesis is at most  $\epsilon$  with probability at least  $1 - \delta$ . Similarly, in the case  
 432 where  $\text{opt} \leq \epsilon$  we have that for  $\sigma = C\epsilon$ , by running Algorithm 1, we obtain a list  $L_1$  of candidates.  
 433 From Lemma 3.5, we get that there is a vector  $\hat{\mathbf{w}} \in L_1$ , such that  $\text{err}_{0-1}(h_{\hat{\mathbf{w}}}) \leq \text{opt} + O(\sigma) \leq O(\epsilon)$ .  
 434 If  $\text{opt} \geq C$  then any halfspace will have error  $\text{err}_{0-1}(h_{\hat{\mathbf{w}}}) \leq \text{poly}(R/U) = O(\text{opt})$ . We conclude  
 435 that the total number of samples will be  $\tilde{O}(d \log(1/\delta)/\epsilon^4)$ . This completes the proof. □

## 436 B Omitted Proofs from Section 4

437 In this section, we show that optimizing convex surrogates of the zero-one loss cannot get error  
 438  $O(\text{opt}) + \epsilon$ , even under Gaussian marginals. Recall that we consider objectives of the form

$$\mathcal{C}(\mathbf{w}) = \mathbf{E}_{\mathbf{x}, y \sim \mathcal{D}}[\ell(-y \langle \mathbf{x}, \mathbf{w} \rangle)], \quad (12)$$

439 where  $\ell(\cdot)$  is a convex loss function. Notice that by considering the *population* version of the  
 440 objective in Equation (2), we essentially rule out the possibility of sampling errors to be the reason  
 441 that the minimizer of the convex objective did not achieve low classification error. With standard  
 442 tools from empirical processes, one can readily get the same result for the empirical objective

443  $(1/N) \sum_{i=1}^N \ell(-y^{(i)} \langle \mathbf{x}^{(i)}, \mathbf{w} \rangle)$  assuming that the sample size  $N$  is sufficiently large. We now restate  
 444 the main result of this section that allows us to show Theorem 1.4.

445 **Theorem B.1.** Fix  $Z > 0, \theta \in (0, \pi/8)$ , and let  $\mathcal{D}_{\mathbf{x}}$  be a radially symmetric distribution on  $\mathbb{R}^2$  such  
 446 that

- 447 1. For all  $t > 0$  it holds  $\Pr_{\mathbf{x} \sim \mathcal{D}_{\mathbf{x}}} [\|\mathbf{x}\|_2 \geq t] > 0$ .  
 448 2.  $\mathbf{E}_{\mathbf{x} \sim \mathcal{D}_{\mathbf{x}}} [\mathbb{1}\{\|\mathbf{x}\|_2 \geq Z\} \|\mathbf{x}\|_2] > 24\theta \mathbf{E}_{\mathbf{x} \sim \mathcal{D}_{\mathbf{x}}} [\|\mathbf{x}\|_2]$ .

449 Then there exists a distribution  $\mathcal{D}$  on  $\mathbb{R}^2 \times \{\pm 1\}$  and a halfspace  $\mathbf{w}^*$  such that  $\text{err}_{0-1}^{\mathcal{D}}(\mathbf{w}^*) \leq$   
 450  $\Pr_{\mathbf{x} \sim \mathcal{D}_{\mathbf{x}}} [\|\mathbf{x}\|_2 \geq Z]$ , the  $\mathbf{x}$ -marginal of  $\mathcal{D}$  is  $\mathcal{D}_{\mathbf{x}}$ , and for every convex, non-decreasing, non-constant  
 451 loss  $\ell(\cdot)$  and every  $\mathbf{w}$  such that  $\theta(\mathbf{w}, \mathbf{w}^*) \leq \theta$  it holds  $\nabla_{\mathbf{w}} \mathcal{C}(\mathbf{w}) \neq \mathbf{0}$ , where  $\mathcal{C}$  is defined in Eq. (2).

452 *Proof.* We start by constructing the noisy distribution  $\mathcal{D}$ . Fix any unit vector  $\mathbf{w}^*$  and let  $\tilde{\mathbf{w}}$  be a vector  
 453 such that  $\theta(\mathbf{w}^*, \tilde{\mathbf{w}}) = \theta_2$ , where  $2\theta \leq \theta_2 \leq \pi/4$ . Denote by  $\tilde{\mathbf{w}}^\perp$  the vector that is perpendicular  
 454 with  $\tilde{\mathbf{w}}$  and satisfies  $\langle \mathbf{w}^*, \tilde{\mathbf{w}}^\perp \rangle \geq 0$ . We now define the regions  $C, S$  that will help us define the parts  
 455 of the distribution where we will introduce noise by flipping the  $y$ -labels, see also Figure 1.

$$C = \{\mathbf{x} : \langle \mathbf{w}^*, \mathbf{x} \rangle \langle \tilde{\mathbf{w}}, \mathbf{x} \rangle \geq 0 \text{ and } \langle \tilde{\mathbf{w}}^\perp, \mathbf{x} \rangle \leq 0\} \quad S = \{\mathbf{x} : \|\mathbf{x}\|_2 \geq Z\}.$$

456 We are now ready to define our noisy distribution  $\mathcal{D}$ : we flip the labels of all points in the set  $S \setminus C$ .  
 457 Observe that  $\text{err}_{0-1}^{\mathcal{D}}(\mathbf{w}^*) \leq \Pr_{\mathbf{x} \sim \mathcal{D}_{\mathbf{x}}} [\|\mathbf{x}\|_2 \geq Z]$ . Take any  $\mathbf{w}$  such that  $\theta_1 = \theta(\mathbf{w}, \mathbf{w}^*) \leq \theta$ . We  
 458 are going to bound from below the norm of the gradient of  $\mathcal{C}$  at  $\mathbf{w}$ . The gradient of  $\mathcal{C}(\mathbf{w})$  is

$$\nabla_{\mathbf{w}} \mathcal{C}(\mathbf{w}) = \mathbf{E}_{(\mathbf{x}, y) \sim \mathcal{D}} [-y \mathbf{x} \ell'(-y \langle \mathbf{x}, \mathbf{w} \rangle)].$$

459 Without loss of generality, we may assume that  $\mathbf{w} = \rho \mathbf{e}_2$ , where  $\rho = \|\mathbf{w}\|_2 > 0$ . We have that the  
 460 first coordinate of the gradient is

$$\langle \nabla_{\mathbf{w}} \mathcal{C}(\mathbf{w}), \mathbf{e}_1 \rangle = \mathbf{E}_{(\mathbf{x}, y) \sim \mathcal{D}} [-y x_1 \ell'(-y \rho x_2)]. \quad (13)$$

461 In what follows, we are going to use polar coordinates  $(r, \phi)$  with the standard relation to Cartesian  
 462  $(\mathbf{x}_1, \mathbf{x}_2) = (r \cos \phi, r \sin \phi)$ . Now assume that we want to compute the contribution of a specific  
 463 region  $A = \{r \in [r_1, r_2], \phi \in [\phi_1, \phi_2]\}$  to the gradient of Equation (13). We denote the 2-  
 464 dimensional density of the radially symmetric distribution  $\mathcal{D}_{\mathbf{x}}$  as  $\gamma(r)$ . We have

$$\begin{aligned} \mathbf{E}_{(\mathbf{x}, y) \sim \mathcal{D}} [-y x_1 \ell'(-y x_2) \mathbb{1}_A(\mathbf{x})] &= \int_{r_1}^{r_2} r \gamma(r) \int_{\phi_1}^{\phi_2} -y r \cos \phi \ell'(-y \rho r \sin \phi) d\phi dr \\ &= \frac{1}{\rho} \int_{r_1}^{r_2} r \gamma(r) \int_{\phi_1}^{\phi_2} (\ell(-y \rho r \sin \phi))' d\phi dr = \frac{1}{\rho} \int_{r_1}^{r_2} r \gamma(r) (\ell(-y \rho r \sin \phi_2) - \ell(-y \rho r \sin \phi_1)) dr. \end{aligned} \quad (14)$$

465 Without loss of generality, we consider the two cases shown in Figure 1. We start with the  
 466 first case, where  $\mathbf{w}$  lies between  $\mathbf{w}^*$  and  $\tilde{\mathbf{w}}$ . We first compute the contribution to the gradi-  
 467 ent in  $S^c$ , i.e., the points where  $y = \text{sign}(\langle \mathbf{w}^*, \mathbf{x} \rangle)$ . Since the distribution is radially symmet-  
 468 ric, we have  $\mathbf{E}_{(\mathbf{x}, y) \sim \mathcal{D}} [-y x_1 \ell'(-y x_2) \mathbb{1}_{S^c}(\mathbf{x})] = 2 \mathbf{E}_{(\mathbf{x}, y) \sim \mathcal{D}} [-y x_1 \ell'(-y x_2) \mathbb{1}_{R_1}(\mathbf{x})]$ , where  
 469  $R_1 = \{r \in [0, Z], \phi \in [\theta_1, \pi + \theta_1]\}$ . From Equation (14), we obtain that

$$I_{S^c} = \mathbf{E}_{(\mathbf{x}, y) \sim \mathcal{D}} [-y x_1 \ell'(-y x_2) \mathbb{1}_{S^c}(\mathbf{x})] = \frac{2}{\rho} \int_0^Z r \gamma(r) (\ell(\rho r \sin \theta_1) - \ell(-\rho r \sin \theta_1)) dr.$$

470 Observe that since  $\ell(\cdot)$  is non-decreasing we have  $I_{S^c} \geq 0$ . Next we compute the contribution  
 471 of region  $S$  to the gradient. Recall that  $S$  contains  $S \setminus C$ , i.e., the region we flipped the labels,  
 472  $y = -\text{sign}(\langle \mathbf{w}^*, \mathbf{x} \rangle)$ , see Figure 1. Using again the fact that the distribution is radially symmetric  
 473 and Equation (13) for the region  $R_2 = \{r \in [Z, +\infty), \phi \in [\pi/2 - \theta_2, 3\pi/2 - \theta_2]\}$ , we obtain

$$\begin{aligned} I_S &= \mathbf{E}_{(\mathbf{x}, y) \sim \mathcal{D}} [-y x_1 \ell'(-y x_2) \mathbb{1}_S(\mathbf{x})] = \frac{2}{\rho} \int_Z^\infty r \gamma(r) \left( \ell(\rho r \sin(\frac{3\pi}{2} - \theta_2)) - \ell(\rho r \sin(\frac{\pi}{2} - \theta_2)) \right) dr \\ &= \frac{2}{\rho} \int_Z^\infty r \gamma(r) (\ell(-\rho r \cos \theta_2) - \ell(\rho r \cos \theta_2)) dr. \end{aligned}$$

474 Similarly to the previous case, the fact that  $\ell(\cdot)$  is non-decreasing implies that  $I_S \leq 0$ .

475 Now we are going to use the facts that  $\ell(\cdot)$  is convex and non-decreasing. Since both  $\theta_1, \theta_2 \leq \pi/4$ ,  
 476 we have that  $\cos \theta_2 \geq \sin \theta_1$  and therefore, from the convexity of  $\ell(\cdot)$ , we obtain

$$\frac{\ell(\rho r \sin(\theta_1)) - \ell(-\rho r \sin \theta_1)}{2\rho r \sin \theta_1} \leq \frac{\ell(\rho r \cos \theta_2) - \ell(-\rho r \sin \theta_1)}{\rho r \cos(\theta_2) + \rho r \sin(\theta_1)}.$$

477 Since  $\ell(\cdot)$  is also non-decreasing, we have that  $\ell(\rho r \cos \theta_2) - \ell(-\rho r \sin \theta_1) \leq \ell(\rho r \cos \theta_2) -$   
 478  $\ell(-\rho r \cos \theta_2)$  and therefore,

$$\ell(\rho r \sin \theta_1) - \ell(-\rho r \sin \theta_1) \leq \frac{2 \sin \theta_1}{\cos \theta_2 + \sin \theta_1} (\ell(\rho r \cos \theta_2) - \ell(-\rho r \cos \theta_2)).$$

479 To simplify notation, we define the functions  $\bar{\ell}(r) = \ell(\rho r \cos \theta_2)$  and  $h(r) = \bar{\ell}(r) - \bar{\ell}(-r)$ . Observe  
 480 that  $\bar{\ell}(\cdot)$  enjoys exactly the same properties as  $\ell(\cdot)$ , that is  $\bar{\ell}(\cdot)$  is convex, non-decreasing, and  
 481 non-constant. Moreover, observe that  $h(r)$  is non-negative and non-decreasing. Using the above  
 482 inequalities, we obtain that

$$\rho \langle \nabla_{\mathbf{w}} \mathcal{C}(\mathbf{w}), \mathbf{e}_1 \rangle = \rho(I_S + I_{S^c}) \leq \frac{4 \sin \theta_1}{\cos \theta_2 + \sin \theta_1} \underbrace{\int_0^Z r \gamma(r) h(r) dr}_{I_2} - 2 \underbrace{\int_Z^\infty r \gamma(r) h(r) dr}_{I_1}. \quad (15)$$

483 We will now show that instead of dealing with every convex and increasing  $\bar{\ell}(\cdot)$ , we can restrict our  
 484 attention to simple piecewise-linear convex and increasing functions. First, we observe that without  
 485 loss of generality we may assume that the convex function  $\bar{\ell}(r)$  is constant for all  $r \leq -Z$ , since  
 486 that part only increases  $I_1$ . To construct  $s(\cdot)$ , we use the supporting lines of  $\bar{\ell}(\cdot)$  at  $-Z$  and 0, and  
 487 the secant line from 0 to  $Z$ . We will first assume that  $\bar{\ell}'(Z) > 0$ . Let  $a_0$  be a subgradient of  $\bar{\ell}(\cdot)$  at  
 488 0. Then the secant from 0 to  $Z$  is some line  $a_1 r - a_0 Z_0$  for some  $a_1 \in [a_0, \bar{\ell}'(Z)]$ . Then, for every  
 489 convex and non-decreasing  $\bar{\ell}(\cdot)$ , the following piecewise-linear function  $s(r)$  makes the ratio  $I_1/I_2$   
 490 smaller. In what follows,  $Z_0 \in [-Z, 0]$  is the intersection point of the supporting line  $a_0 r - a_0 Z_0$   
 491 and the constant supporting line at  $-Z$ .

$$s(r) = b + \begin{cases} 0, & r \leq Z_0 \\ a_0 r - a_0 Z_0, & Z_0 < r \leq 0 \\ a_1 r - a_0 Z_0, & 0 < r \end{cases}.$$

492 We have

$$h(r) = \begin{cases} (a_1 + a_0)r, & 0 \leq r \leq -Z_0, \\ a_1 r - a_0 Z_0 & -Z_0 < r \end{cases}.$$

493

$$I_1 = a_1 \int_Z^\infty r^2 \gamma(r) dr - a_0 Z_0 \int_Z^\infty r \gamma(r) dr \geq a_1 \int_Z^\infty r^2 \gamma(r) dr.$$

494

$$\begin{aligned} I_2 &= (a_1 + a_0) \int_0^{-Z_0} r^2 \gamma(r) dr + a_1 \int_{-Z_0}^Z r^2 \gamma(r) dr - a_0 Z_0 \int_{-Z_0}^Z r \gamma(r) dr \\ &\leq 2(a_1 + a_0) \int_0^Z r^2 \gamma(r) dr \leq 4a_1 \int_0^Z r^2 \gamma(r) dr. \end{aligned}$$

495 Using the above bounds in Equation (15), we obtain

$$\langle \nabla_{\mathbf{w}} \mathcal{C}(\mathbf{w}), \mathbf{e}_1 \rangle \leq \frac{2a_1}{\rho} \left( \frac{8 \sin \theta_1}{\cos \theta_2 + \sin \theta_1} \int_0^Z r^2 \gamma(r) dr - \int_Z^\infty r^2 \gamma(r) dr \right).$$

496 Removing the positive quantity  $\sin \theta_1$  of the denominator and replacing  $\theta_1$  by its upper bound  $\theta$ , we  
 497 obtain the claimed bound. Since  $\cos \theta_2$  is decreasing in  $[0, \pi/2]$ , we may choose  $\theta_2 = 2\theta$ . Our final  
 498 bound is then

$$\begin{aligned} \langle \nabla_{\mathbf{w}} \mathcal{C}(\mathbf{w}), \mathbf{e}_1 \rangle &\leq \frac{2a_1}{\rho} \left( 8 \tan(2\theta) \int_0^Z r^2 \gamma(r) dr - \int_Z^\infty r^2 \gamma(r) dr \right) \\ &\leq \frac{2a_1}{\rho} \left( 24\theta \mathbf{E}_{\mathbf{x} \sim \mathcal{D}_{\mathbf{x}}} [\|\mathbf{x}\|_2] - \mathbf{E}_{\mathbf{x} \sim \mathcal{D}_{\mathbf{x}}} [\mathbf{1}\{\|\mathbf{x}\|_2 > Z\} \|\mathbf{x}\|_2] \right), \end{aligned}$$

499 where for the last inequality we used the fact that  $\tan(2\theta) \leq 3\theta$  for all  $\theta \in [0, \pi/8)$ . In the case  
500 where  $\ell'(\rho Z \cos \theta_2) = 0$ , the above bound vanishes. We first assume that this is not the case. Then,  
501 using Assumption 2 of our theorem, we obtain that  $\langle \nabla_{\mathbf{w}} \mathcal{C}(\mathbf{w}), \mathbf{e}_1 \rangle \neq 0$  and therefore  $\nabla_{\mathbf{w}} \mathcal{C}(\mathbf{w}) \neq \mathbf{0}$ .

502 In the case where  $\ell'(\rho Z \cos \theta_2) = 0$ , we observe that  $I_{S^c}$  vanishes. To finish the proof, we need to  
503 bound from above and away from zero the integral  $I_S$ . Since  $\bar{\ell}(\cdot)$  is non-constant, there exists a point  
504  $Z' > Z$  with  $\bar{\ell}'(Z') > 0$ . Convexity of  $\bar{\ell}(\cdot)$  implies  $h(r) \geq \bar{\ell}'(Z')r$ . Using this fact, we get

$$I_S \leq -\bar{\ell}'(Z') \int_{Z'}^{\infty} r^2 \gamma(r) dr.$$

505 Using Assumption 1 of our theorem, we again get that  $\nabla_{\mathbf{w}} \mathcal{C}(\mathbf{w}) \neq \mathbf{0}$ .

506 Next we handle the case where the candidate  $\mathbf{w}$  lies out of the cone formed by  $\mathbf{w}^*$  and  $\tilde{\mathbf{w}}$ . In that  
507 case, similarly to before, we compute the contribution to the gradient of the noisy samples  $S$  and the  
508 non-noisy  $S^c$ .

$$I_{S^c} = \mathbf{E}_{(\mathbf{x}, y) \sim \mathcal{D}} [-y \mathbf{x}_1 \ell'(-y \mathbf{x}_2) \mathbb{1}_{S^c}(\mathbf{x})] = \frac{2}{\rho} \int_0^Z r \gamma(r) (\ell(-\rho r \sin \theta_1) - \ell(\rho r \sin \theta_1)) dr.$$

509 and

$$I_S = \mathbf{E}_{(\mathbf{x}, y) \sim \mathcal{D}} [-y \mathbf{x}_1 \ell'(-y \mathbf{x}_2) \mathbb{1}_S(\mathbf{x})] = \frac{2}{\rho} \int_Z^{\infty} r \gamma(r) (\ell(-\rho r \cos \theta_2) - \ell(\rho r \cos \theta_2)) dr.$$

510 In contrast to the previous case, we now observe that since  $\ell(\cdot)$  is non-decreasing, both  $I_S$  and  $I_{S^c}$   
511 have the same sign, i.e., they are both non-positive. From Assumption 1, and the fact that  $\ell(\cdot)$  is  
512 non-constant, we obtain that  $I_S + I_{S^c} < 0$ , which in turn implies that  $\nabla_{\mathbf{w}} \mathcal{C}(\mathbf{w}) \neq \mathbf{0}$ .  $\square$

513 We are now ready to give the proof of Theorem 1.4, which we restate below for convenience.

514 **Theorem 1.4.** Let  $\mathcal{D}_{\mathbf{x}}$  be the standard normal distribution on  $\mathbb{R}^d$ . There exists a distribu-  
515 tion  $\mathcal{D}$  on  $\mathbb{R}^d \times \{\pm 1\}$  such that for every convex, non-decreasing loss  $\ell(\cdot)$ , the objective  
516  $\mathcal{C}(\mathbf{w}) = \mathbf{E}_{\mathbf{x}, y \sim \mathcal{D}} [\ell(-y \langle \mathbf{x}, \mathbf{w} \rangle)]$  is minimized at some halfspace  $h$  with error  $\text{err}_{0-1}^{\mathcal{D}}(h) =$   
517  $\Omega(\text{opt} \sqrt{\log(1/\text{opt})})$ . Moreover, there exists a log-concave marginal  $\mathcal{D}_{\mathbf{x}}$  (resp.  $s$ -heavy tailed  
518 marginal) such that  $\text{err}_{0-1}^{\mathcal{D}}(h) = \Omega(\text{opt} \log(1/\text{opt}))$  (resp.  $\text{err}_{0-1}^{\mathcal{D}}(h) = \Omega(\text{opt}^{1-1/s})$ ).

519 *Proof.* Since all the examples that we are going to consider will be radially invariant distributions,  
520 we note that the “disagreement” error of two halfspaces with normal vectors  $\mathbf{v}, \mathbf{u}$  is  $\theta(\mathbf{v}, \mathbf{u})/\pi$ .  
521 From Claim 3.4, we have that the classification error of any candidate  $\mathbf{w}$  is lower bounded by  
522  $\theta(\mathbf{w}, \mathbf{w}^*)/\pi - \text{opt}$ . We will construct a distribution  $\mathcal{D}$  such that there is some  $\mathbf{w}^*$  that achieves error  
523  $\text{opt}$ , but at the same time  $\mathcal{C}(\mathbf{w})$  is minimized at some halfspace such that  $\theta(\mathbf{w}, \mathbf{w}^*) = \omega(\text{opt})$ . This  
524 means that the minimizer of  $\mathcal{C}$  has classification error  $\omega(\text{opt})$ .

525 We assume first that  $\mathcal{D}_{\mathbf{x}}$  is the standard normal and without loss of generality work in two dimensions.  
526 Recall that the density function in this case is radially invariant, i.e.,  $\gamma(\mathbf{x}_1, \mathbf{x}_2) = \frac{1}{2\pi} e^{-\|\mathbf{x}\|_2^2/2}$ . If  $\ell$   
527 is a constant function, any halfspace would minimize it and therefore, this case is trivial. Clearly,  
528 Assumption 1 of Theorem B.1 holds in this case. We now show that we can pick  $Z > 0$  such that the  
529 probability of all points with flipped label is  $O(\text{opt})$  and make Assumption 2 of Theorem B.1 true.  
530 Since the distribution is Gaussian, we have that for  $Z = \Theta(\sqrt{\log(1/\text{opt})})$  it holds  $\Pr[\|\mathbf{x}\|_2 \geq Z] \leq$   
531  $\text{opt}$ . Since the distribution is isotropic, we have  $\mathbf{E}_{\mathbf{x} \sim \mathcal{D}_{\mathbf{x}}} [\|\mathbf{x}\|_2] \leq \sqrt{\mathbf{E}_{\mathbf{x} \sim \mathcal{D}_{\mathbf{x}}} [\|\mathbf{x}\|_2^2]} = 1$ . Moreover,  
532 we have that

$$\mathbf{E}_{\mathbf{x} \sim \mathcal{D}_{\mathbf{x}}} [\mathbb{1}\{\|\mathbf{x}\|_2 \geq Z\} \|\mathbf{x}\|_2] = \int_Z^{\infty} r^2 e^{-r^2/2} dr \geq e^{-Z^2/2} Z = \Theta(\text{opt} \sqrt{\log(1/\text{opt})}).$$

533 Now we can fix some  $\theta = \Omega(\text{opt} \sqrt{\log(1/\text{opt})}) < \pi/8$  and observe that Assumption 2 of The-  
534 orem B.1 is satisfied. Therefore, we have that for any halfspace with normal vector  $\mathbf{w}$  with  
535  $\theta(\mathbf{w}, \mathbf{w}^*) \leq \theta = \Omega(\text{opt} \sqrt{\log(1/\text{opt})})$  it holds that  $\nabla_{\mathbf{w}} \mathcal{C}(\mathbf{w}) \neq \mathbf{0}$ , and therefore it cannot be a  
536 minimizer of  $\mathcal{C}(\mathbf{w})$ .

537 For the log-concave marginals the argument is similar. We work again in two dimensions and pick  
538  $\gamma(\mathbf{x}) = \frac{6}{\pi} e^{-2\sqrt{3}\|\mathbf{x}\|_2}$ . This distribution is isotropic log-concave. We have that for  $Z = \Theta(\log(1/\text{opt}))$

539 it holds that  $\Pr[\|\mathbf{x}\|_2 \geq Z] \leq \text{opt}$ . Moreover, we have  $\mathbf{E}_{\mathbf{x} \sim \mathcal{D}_{\mathbf{x}}} [\mathbb{1}\{\|\mathbf{x}\|_2 \geq Z\} \|\mathbf{x}\|_2] \geq$   
 540  $(\sqrt{3}/(2\pi))e^{-2\sqrt{3}Z} Z = \Omega(\text{opt} \log(1/\text{opt}))$ .

541 Now we can fix some  $\theta = \Omega(\text{opt} \log(1/\text{opt})) < \pi/8$  and observe that Assumption 2 of Theorem B.1  
 542 is satisfied. Therefore, we have that for any halfspace with normal vector  $\mathbf{w}$  with  $\theta(\mathbf{w}, \mathbf{w}^*) \leq \theta =$   
 543  $\Omega(\text{opt} \log(1/\text{opt}))$  it holds that  $\nabla_{\mathbf{w}} \mathcal{C}(\mathbf{w}) \neq \mathbf{0}$ , and as a result it cannot be a minimizer of  $\mathcal{C}(\mathbf{w})$ .

544 For the heavy tailed marginals, the argument is similar. We work again in two dimensions, and for  
 545 any  $s > 2$  we pick

$$\gamma(\mathbf{x}) = \frac{b_s}{\left(\frac{\|\mathbf{x}\|_2}{a_s} + 1\right)^{2+s}},$$

546 where the constants  $a_s, b_s$  depend only on  $s > 2$  and are appropriately picked so that the distribution  
 547 is isotropic. Using polar coordinates, we have

$$\Pr[\|\mathbf{x}\|_2 \geq Z] = 2\pi \int_Z^\infty \frac{r b_s}{\left(\frac{r}{a_s} + 1\right)^{2+s}} dr = \frac{2\pi b_s}{s(1+s)} \frac{a_s + (s+1)Z}{(a_s + Z)^{1+s}}.$$

548 Therefore, for  $Z = \Theta((1/\text{opt})^{1/s})$  it holds that  $\Pr[\|\mathbf{x}\|_2 \geq Z] \leq \text{opt}$ . Moreover, we have

$$\mathbf{E}_{\mathbf{x} \sim \mathcal{D}_{\mathbf{x}}} [\mathbb{1}\{\|\mathbf{x}\|_2 \geq Z\} \|\mathbf{x}\|_2] = 2\pi \int_Z^\infty \frac{r^2 b_s}{\left(\frac{r}{a_s} + 1\right)^{2+s}} dr = \frac{b_s (2a_s^2 + 2a_s(s+1)Z + s(s+1)Z^2)}{s(s^2-1)(a_s + Z)^{s+1}}.$$

549 Therefore, for  $Z = \Theta((1/\text{opt})^{1/s})$  it holds  $\mathbf{E}_{\mathbf{x} \sim \mathcal{D}_{\mathbf{x}}} [\mathbb{1}\{\|\mathbf{x}\|_2 \geq Z\} \|\mathbf{x}\|_2] = \Omega(\text{opt}^{1-1/s})$ . We can  
 550 now fix some  $\theta = \Omega(\text{opt}^{1-1/s}) < \pi/8$  and observe that Assumption 2 of Theorem B.1 is satisfied.  
 551 Therefore, we have that for any halfspace with normal vector  $\mathbf{w}$  with  $\theta(\mathbf{w}, \mathbf{w}^*) \leq \theta = \Omega(\text{opt}^{1-1/s})$   
 552 it holds that  $\nabla_{\mathbf{w}} \mathcal{C}(\mathbf{w}) \neq \mathbf{0}$ , and as a result it cannot be a minimizer of  $\mathcal{C}(\mathbf{w})$ .  $\square$
